# Supplementary material
Source: publisher figshare collection journal article supplement (https://gsapubs.figshare.com/ndownloader/files/22409325)
Supplement: Supplementary file 1 [file 22409325]

## Sheet: DR-3 XRF trace
Putnam, R., Glazner, A.F., Coleman, D.S., Kylander-Clark, A.R.C., Pavelsky, T., and Abbot, M.I., 2015, Plutonism in three dimensions: Field and geochemical relations on the southeast face of El Capitan, Yosemite National Park, California: Geosphere, v. 11, doi:10.1130/GES01133.1.
SUPPLEMENTAL TABLE 2. TRACE ELEMENT DATA DETERMINED BY XRF
Sample number	Rock type	Host rock*	Relative elevation (m)†	Ni (ppm)	Cu (ppm)	Zn (ppm)	Rb (ppm)	Sr (ppm)	Y (ppm)	Zr (ppm)	Nb (ppm)	Ba (ppm)	Th (ppm)	Location description§
BRO-01	Kap	Ks	N.A.	0	2	12.4	169.01	87.82	2.54	26.8	0.9	78.67	17.8	Lower Brother, 30 m right of Positively 4th Street
BRO-02	Kap	Khd	N.A.	0.8	2	15.9	134.68	82.29	1.74	22.9	0	76.66	22.5	10 m right of Rixon's PinN.A.cle Right
EB-01	Kap	Kd	N.A.	3.2	0.7	13.5	319.89	10.41	7.21	12.4	4.8	2.07	10.4	The East Buttress, belay 4
ECT-02	Kap	Kd	N.A.	0.8	0.8	15.5	90.77	124.81	17.21	60.9	10.8	472.31	8	El Capitan Tree, belay 5
ECT-06	Kap	Kd	N.A.	0	0	15.4	113.33	80.23	15.92	27.5	13.8	345.81	5.8	El Capitan Tree, 20 m down the first rappell
EGP-01	Kap	Kec	N.A.	1.7	0.8	10	170.67	187.65	26.52	25.4	31.4	1212.24	6.1	269280, 4181129
EGP-02	Kap	Kec	N.A.	0	1.4	11.9	92.72	92.2	9.48	36.3	11.8	240.73	26	268756, 4180619
EL-01	Kap	Kec	N.A.	0.1	0.3	20.8	177.29	12.06	6.81	107.9	0	13.25	34.6	East Ledges Decent, first rappel station
EL-02	Kap	Kec	N.A.	1.3	0.6	14.8	187.51	40.21	3.34	23.2	0	33.8	32.6	East Ledges Decent, 20 m left of the third rappel
FS-01	Kap	Kt	N.A.	4.2	0	12.5	129.14	76.21	14.51	23	7.5	261.6	5.3	The Footstool, left side of summit
FS-03	Kap	Kt	N.A.	1.8	4.9	19.6	130.95	91.22	12.42	33.2	14.6	448.29	7.5	3 m up Wyoming Sheep Ranch
FT-01	Kap	Kec	N.A.	3.1	2.7	10.8	164.23	21.42	32.65	39.5	14	49.87	34.1	271045, 4181409
FT-02	Kap	Kec	N.A.	2.6	3.1	11.3	146.2	107.58	22.81	101.2	9.8	512.24	45	270765, 4181945
FT-03	Kap	Kec	N.A.	3.2	6.7	11.5	152.03	23.89	20.54	28.6	15.4	58.52	29.7	271047, 4182592
FT-04	Kap	Kec	N.A.	1.1	1	10.6	140.68	39.44	6.83	0	4.1	96.72	13.1	270861, 4183146
LE-01	Kap	Kt	N.A.	0.3	0.9	23	147.53	84.94	12.14	39.3	22	596.27	6.1	Start of Lunar Eclipse
ME-01	Kap	Kt	N.A.	0.3	0	10.3	125.04	59.74	9.08	17.2	7.1	114.37	10.4	Mescalito, belay 26
NED-11	Kap	Kt	N.A.	0.9	1.4	13.6	126.82	56.4	22.74	34.3	15.2	168.07	9.2	New Dawn, belay 28
NF-01	Kap	Khd	N.A.	0	5.9	10.8	165.73	121.98	2.13	55.3	0	184.52	20.2	216136, 4178441
NO-02	Kt	N.A.	689	N.D.	N.D.	N.D.	155.937	391.847	14.424	152	N.D.	2032.64	28	The Nose, belay 25
NO-05	Kt	N.A.	812	2	N.D.	N.D.	141.895	312.898	23.852	201	N.D.	891.463	19	The Nose, belay 29
NS-02	Kap	Klt	N.A.	0.7	2.8	19.3	159.96	50.73	16.02	26.8	12.5	252.39	6.2	10 m left of N.A.tive Son start
PRO-06	Kap	Kt	N.A.	3.3	0	15.3	305.19	9.27	6.58	27.2	2.2	20.35	9.4	The Prophet, belay 3
PRO-08	Kap	Kt	N.A.	1.4	1.4	19.7	135.72	59.86	17.22	28.6	9.7	284.04	8.6	40 m right of The Prophet start
RA-01	Kap	Khd	N.A.	1.7	1.8	19.8	180.2	223.2	3.12	32.7	2	395.19	19.3	The Royal Arches, belay 7
RA-02	Kap	Khd	N.A.	0.8	4.9	20.5	172.88	225.37	3.89	35.8	0.8	400.57	16.8	The Royal Arches, belay 9
RA-03	Kap	Khd	N.A.	1.3	2.9	17	169.66	227.87	1.88	31.9	0	575.32	16.7	274008, 4181083
RA-04	Kap	Khd	N.A.	1.7	5.7	17.9	277.34	39.94	3.63	27.8	1.5	34.96	21.4	274737, 4181089
RHO-01	Kap	Kgp	N.A.	0.4	19.9	10.7	165.08	85.77	2.49	30	3	93.74	18.5	30 m right Rhombus Wall talus summit
RS-01	Kap	Kt	N.A.	1.5	0.1	21.6	147.6	82.18	18.02	51.2	15.8	464.76	11.9	20 m left of rust streak the Waterfall Route start
SS-02	Kap	Kec	N.A.	1.9	4.6	21.8	159.62	147.01	16.57	66.1	18.9	751.49	8.1	South Seas start
SW-03	Kap	Kec	N.A.	0.2	0	32.8	105.95	204.69	10.98	72	15.6	1083.92	8.4	Salathe Wall, belay 10
WOEML-01	Kap	Kec	N.A.	0.3	0.9	15.2	85.68	96.64	7.79	18.1	3.9	260.38	20.2	10m up the Wall of Early Morning Light
YOS-1#	Kt	N.A.	10	2	N.D.	31.85	165.44	201.34	9.23	N.D.	9.39	1244.64	26.76	El Cap Slab - near ESC-01
YOS-180#	Kec	N.A.	0	N.D.	N.D.	N.D.	119	216	N.D.	N.D.	N.D.	806	36.1	Start of the Nose
ZO-04	Kap	Kd	N.A.	6.6	0	8.4	429.69	28.42	52.45	87	23.2	83.15	18.2	Zodiac, belay 6
ZO-05	Kap	Kd	N.A.	4.1	1.8	19.8	345.88	0	35.83	95.5	16.2	4.09	24.4	Zodiac, belay 7
AGV--1**			mean	17.5	N.A.	N.A.	73.2	704	21	280	18.8	1164	9.3
			accepted	19			68.6	658	20	230	15	1140	6.1
			s.d.	4.9			0.6	0.2	3.6	0.3	4.6	0.7	10.3
Note: Samples stored in the collections of University of North Carolina, Chapel Hill Department of Geological Sciences, Chapel Hill, North Carolina 27599. Trace element compositions in parts per million (ppm). N.A. = not available, N.D. = not determined
*The rock in which the aplite dike is hosted. N.A. if the sample is not an aplite.
†The elevation, in meters, above the lowest point of exposed rock on the southwest face of El Capitan, near the start of the Nose (Figure 4)
§Most samples were taken from >500m cliffs, rendering GPS innacurate. Therefore, locations are described relative to climbing routes (Reed, 1996; Putnam and Sloan, 2014) as observed facing the cliff. UTMs given in NAD 1983 Zone 11S.
# From Ratajeski et al., 2001
**Results of 4 replicate analyses of USGS standard AGV-1
